# Supplementary material for: Int6/eIF3e Is Essential for Proliferation and Survival of Human Glioblastoma Cells
Source: Int J Mol Sci. 2014 Jan 29;15(2):2172–90. doi: 10.3390/ijms15022172 (PMC3958844; doi:10.3390/ijms15022172)

## Supplementary Information

**Figure S1.** *Int6* gene silencing efficiency. (A) Western Blot analysis of *Int6* expression at different times after siRNA transfection. *Int6* expression is strongly silenced in *Int6* knockdown GBM cells (siInt6) compared to negative control (siScr) at 24 h, 48 h, 96 h and 7 days after siRNA transfection; (B) Western Blot analysis of *Int6* expression using different siRNA concentrations. *Int6* expression is inhibited with siInt6 treatment starting at 1 nM, 5 nM and 50 nM of siRNA in all glioma cell lines; (C) Western Blot analysis of HIF-1 $\alpha$  and HIF-2 $\alpha$  expression after *Int6* inhibition. HIF-1 $\alpha$  and HIF-2 $\alpha$  expression is reduced in human GBM cells where *Int6*/eIF3e is inhibited (siInt6); (D) Western Blot analysis of *Int6* and HIF-2 $\alpha$  expression after transfection with other siRNA sequences against *Int6* (siInt6, Dharmacon On-Target plus Smart pool). *Int6* inhibition is confirmed as well as the decreased HIF-2 $\alpha$  expression in human GBM cells when *Int6*/EIF3E is silenced; (E) Western Blot analysis of *Int6*, HIF-1 $\alpha$  and HIF-2 $\alpha$  expression after transfection with siInt6 from Qiagen Pool FlexiTube Gene Solution (Qiagen, Venlo, Limburg, Netherlands). *Int6* inhibition is confirmed as well as the decreased HIF expression in human GBM cells when *Int6*/EIF3E is silenced.

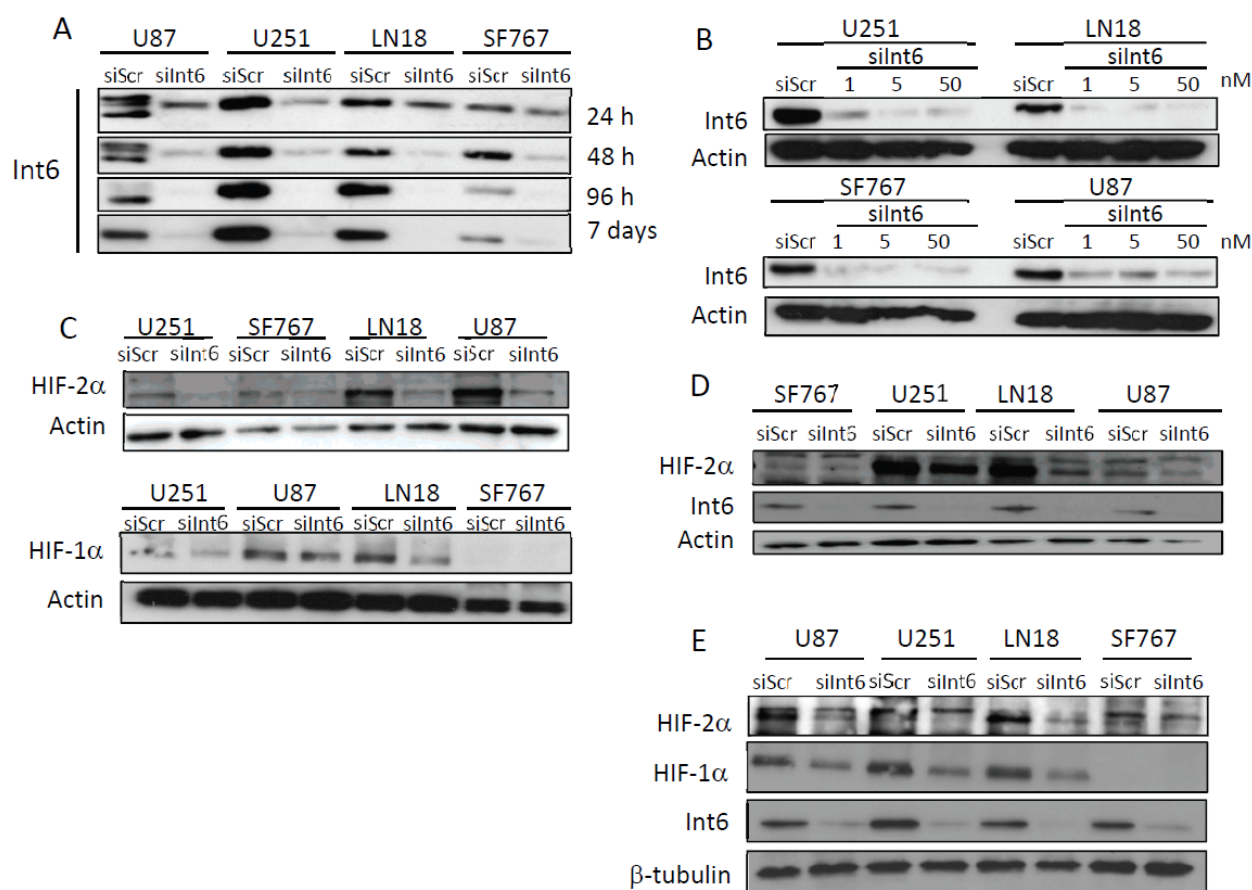

**Figure S2.** Int6 inhibition with different and distinct siRNA sequences also alters human glioma cell proliferation. Proliferation assay with GBM cells transfected or not with (A) *Int6* siRNA (siInt6, Dharmacon On-Target plus Smart pool) or (B) *Int6* siRNA (siInt6, Qiagen Pool FlexiTube Gene Solution, Qiagen, Venlo, Limburg, Netherlands) shows a significant decreased GBM cell growth when Int6 is inhibited compared to the negative control group (\*  $p < 0.05$ , \*\*  $p < 0.01$ , \*\*\*  $p < 0.001$  siInt6 versus siScr,  $n = 3$ ).

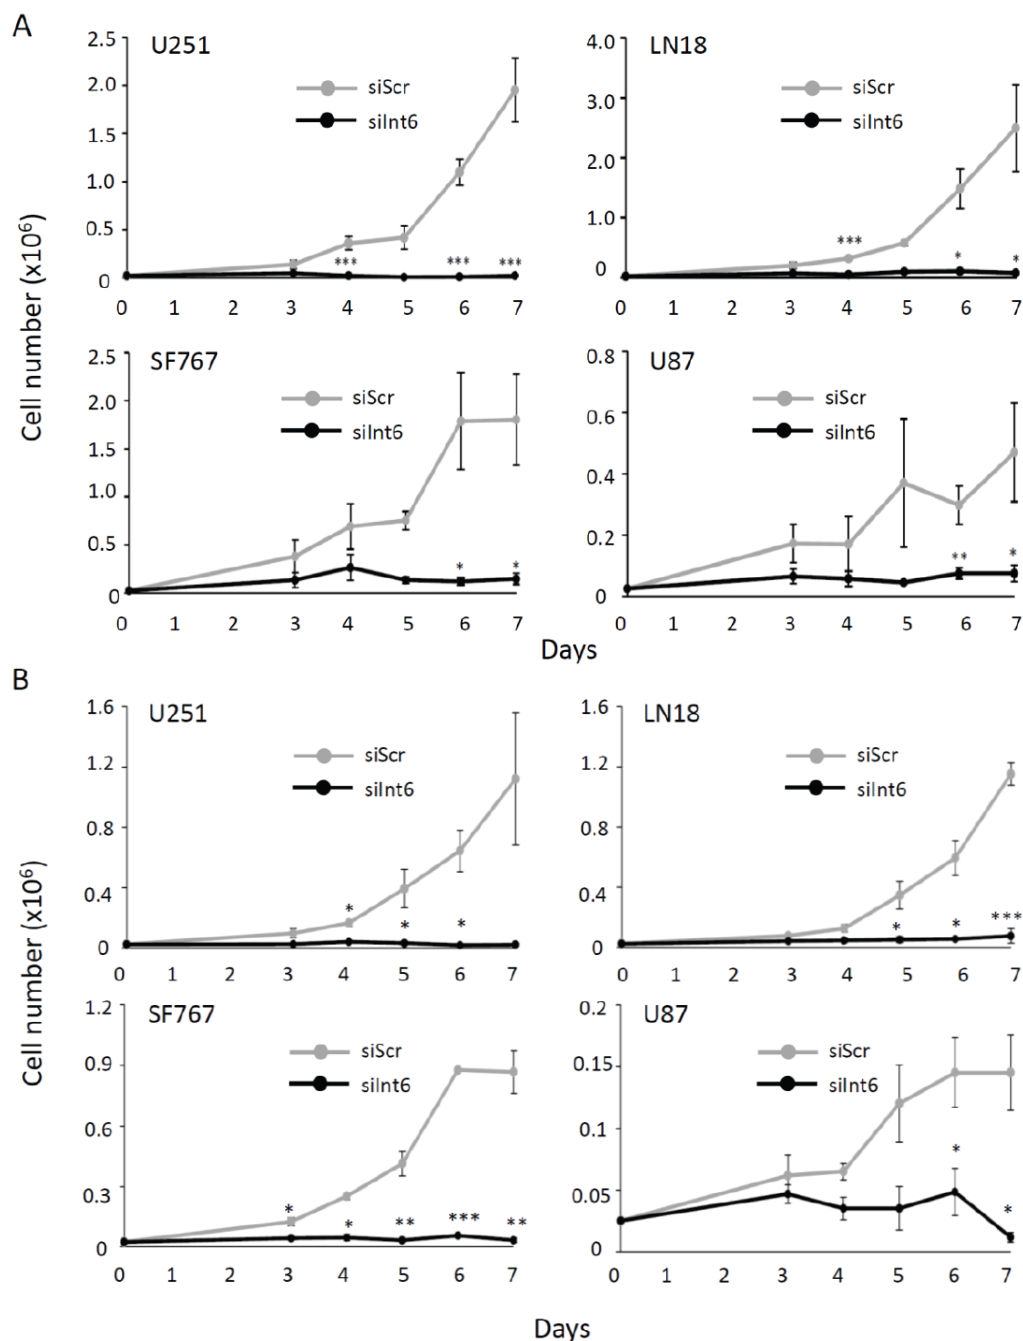

**Figure S3.** *Int6* gene silencing halts cell cycle in glioma cells. **(A)** Representative dot plots of cell cycle distribution in four GBM cell lines (U87, U251, LN18 and SF767). FL2-H represents the Propidium Iodide staining; **(B)** Representative dot plots of GBM cells in G0 phase. *Int6* knockdown (siInt6) significantly increases the number of Ki67 negative cells compared to negative control group (siScr),  $n = 4$ . FL1-H represents Ki67 staining and FL2-H represents Propidium Iodide staining.

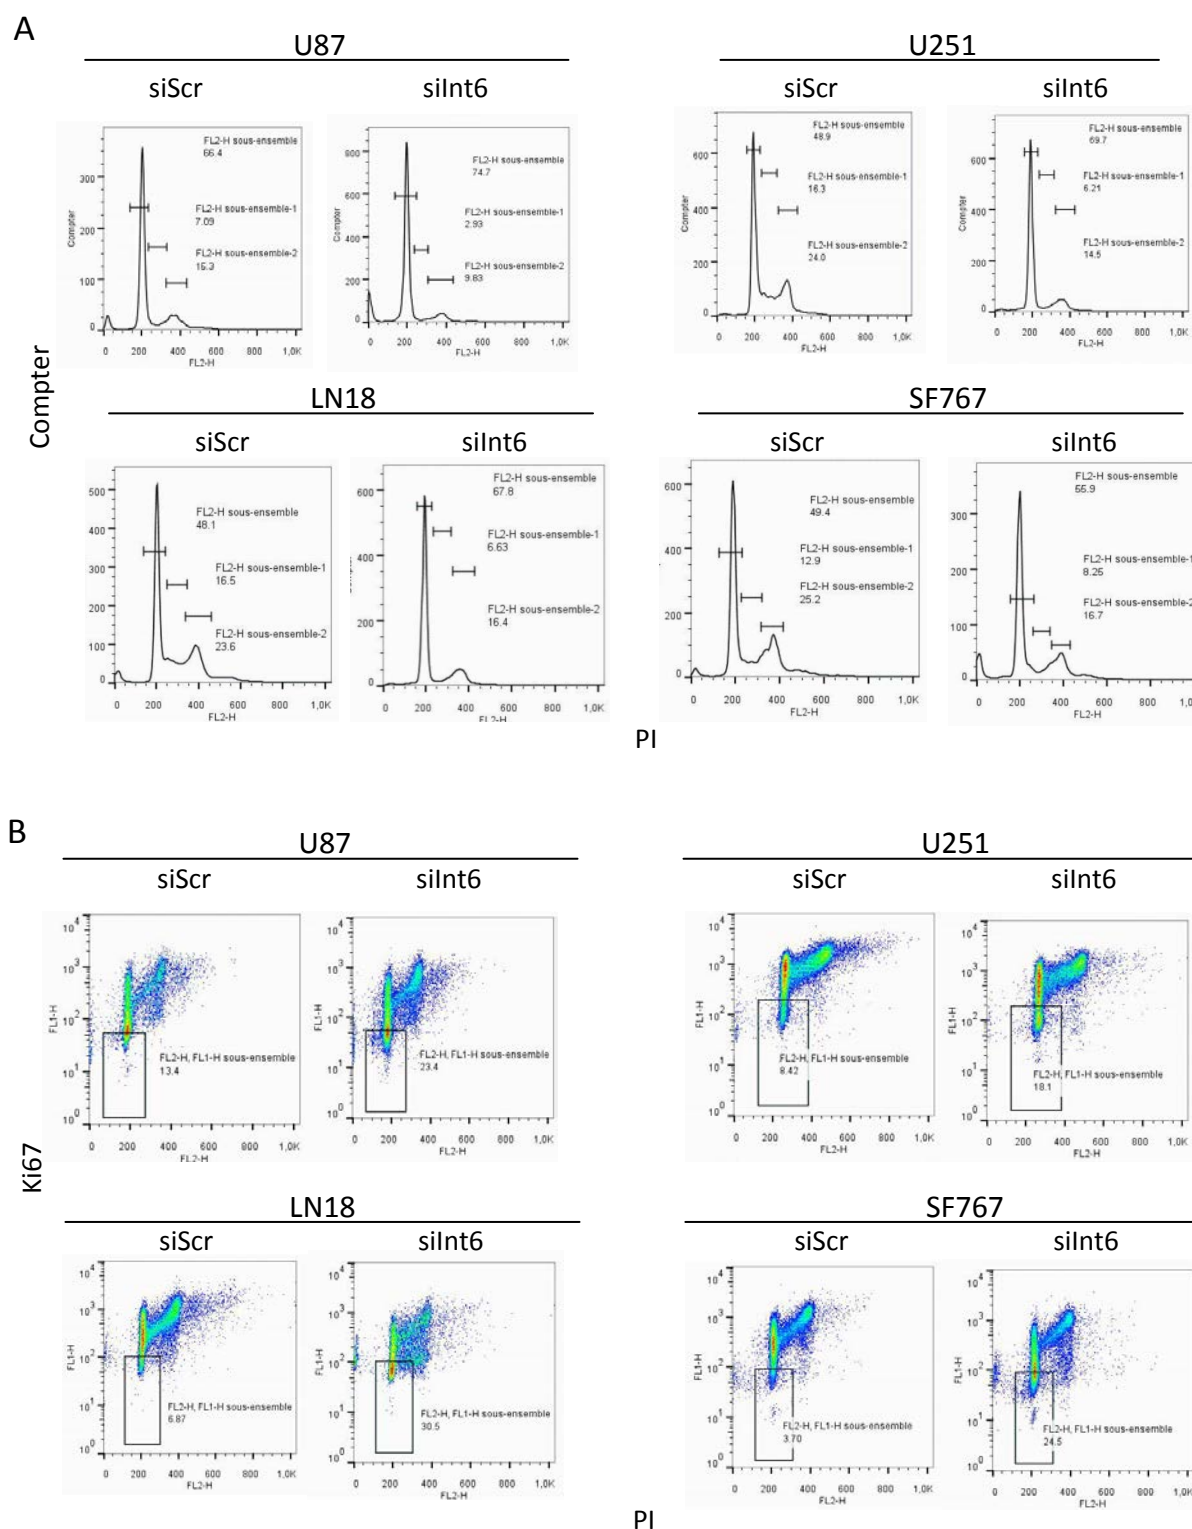

**Figure S4.** *Int6* gene silencing induces human glioma cell apoptosis. (A) Representative dot plots showing percentage of Annexin V positive cells in GBM cell lines (U251 and SF767). FL1-H represents Annexin V-FITC staining and FL2-H represents Propidium Iodide staining; (B) Western Blot analysis of caspase 3 and PARP expression in GBM cells following *Int6* silencing. Caspase 3 and PARP expressions are reduced in *Int6* knockdown group compared to negative control group (siScr); (C) Western Blot analysis of, the pro-apoptotic protein, Bax expression in GBM cells. Bax expression increases in all glioma cell lines after transfection with different siInt6 concentrations (1, 5 or 50 nM) compared to negative control group (siScr).

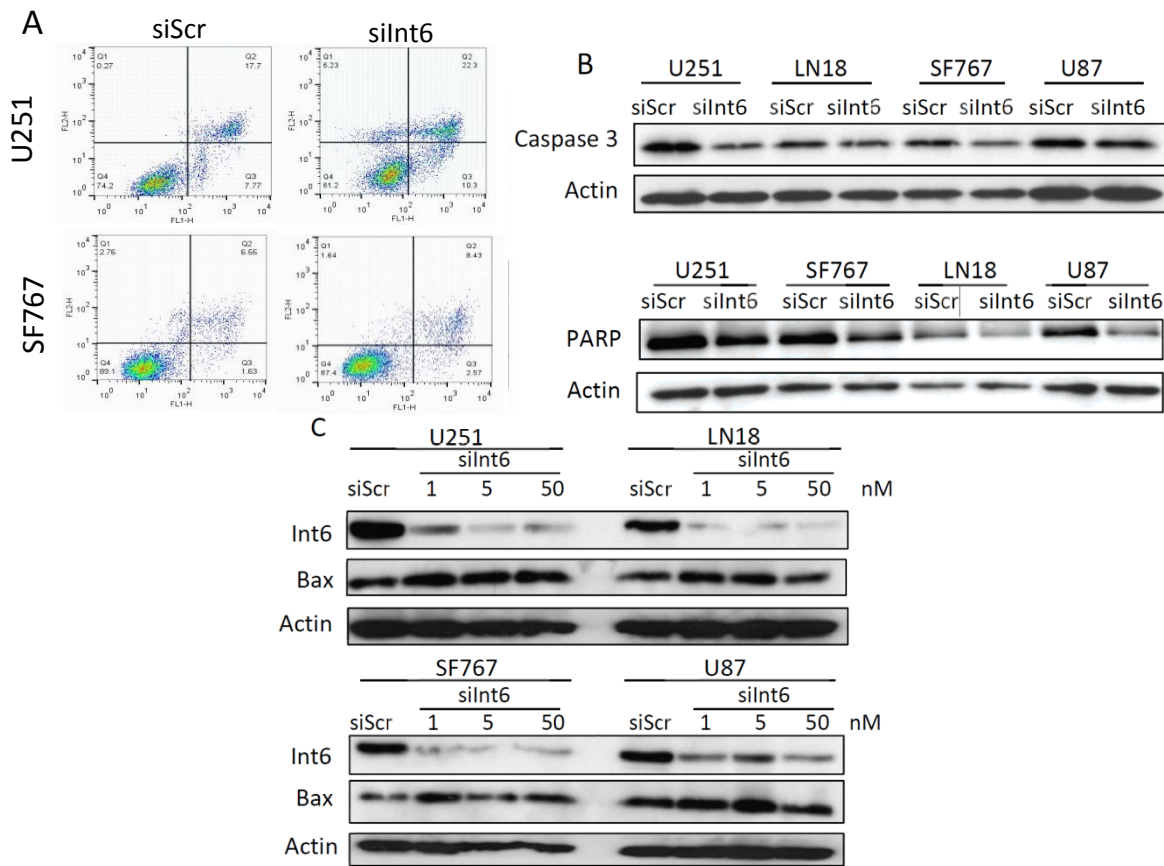

**Figure S5.** *Int6* gene silencing does not alter global GBM cell translation. (A) Total proteins of the same number of glioma cells transfected or not with siInt6 (72 h after transfection) were resolved by SDS-polyacrylamide gel and stained with blue Coomassie. Lane M, molecular weight marker; at the bottom of the gel is indicated the number of cells loaded for each cell line. *De novo* protein synthesis in U251 cells was assessed, 24 h (D1), 48 h (D2) and 72 h (D3) after transfection with siInt6 or control siRNA (siScr) using  $^{35}\text{S}$  metabolic labeling (B) and Coomassie blue staining (C),  $n = 3$ .

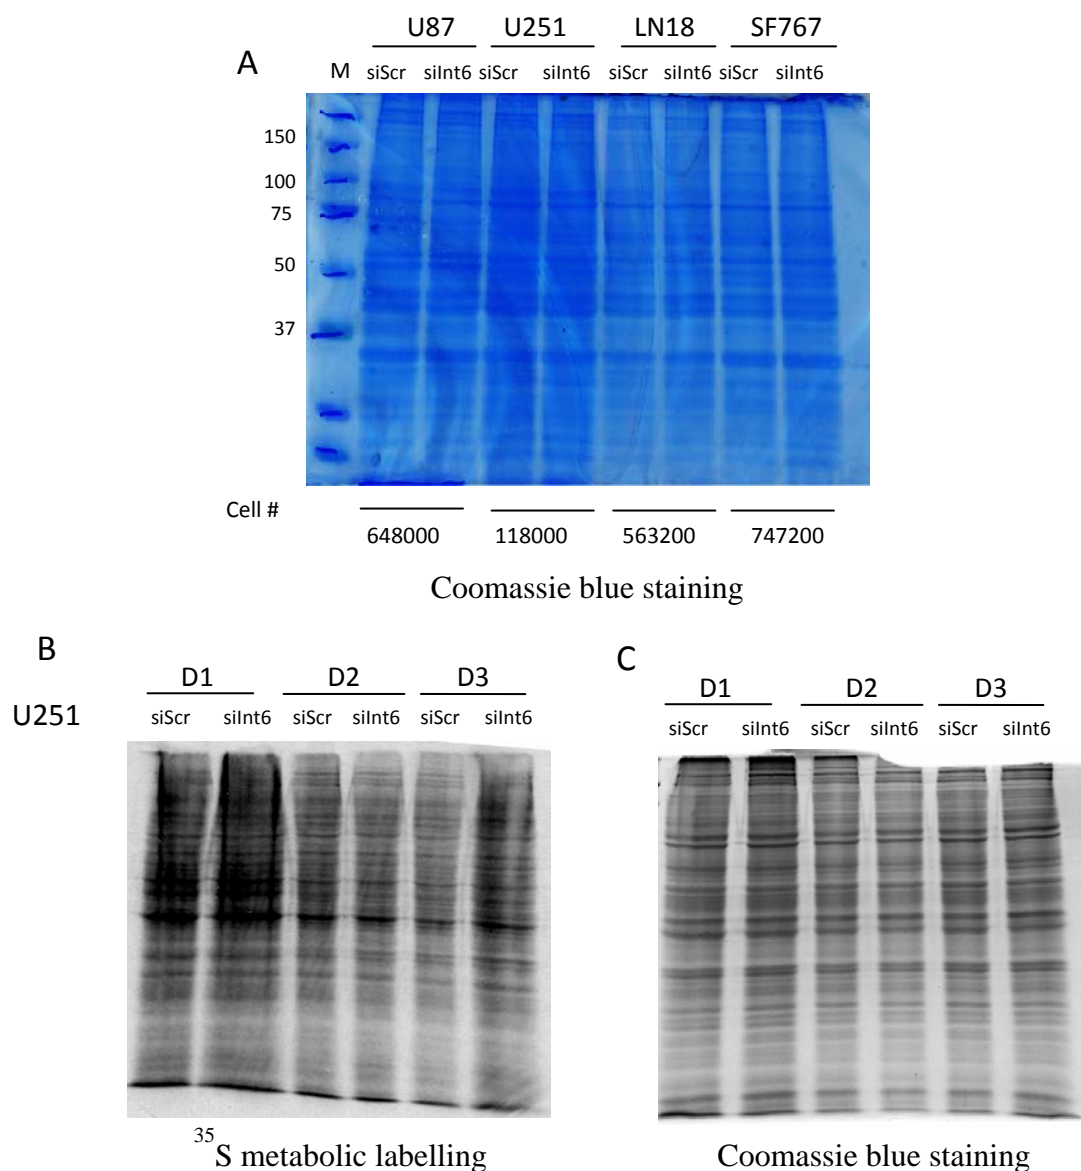

**Figure S6.** Int6 deletion affects human glioma cell migration. **(A)** Migration of control cells (siScr) or cells where Int6 is inhibited (siInt6) was assessed using a scratch wound assay. Test was performed with LN18, SF767 and U251 cell lines. Of note, U87 cells do not form a monolayer of cells and we were therefore unable to perform the test for these cells. Representative photographs shown in **(A)** were taken after the scratch (T0), and 20 h later (T20). We selected time points <24 h to avoid the effect of Int6 inhibition on proliferation **(B)** Percentage of wound closure was determined, 13 h (T13) and 20 h (T20) after wound, at consistent locations and was significantly decreased for siInt6 cells compared to siScr control cells at 20 h (\*  $p < 0.05$ , \*\*  $p < 0.01$ , \*\*\*  $p < 0.001$ ,  $n = 3$ ).

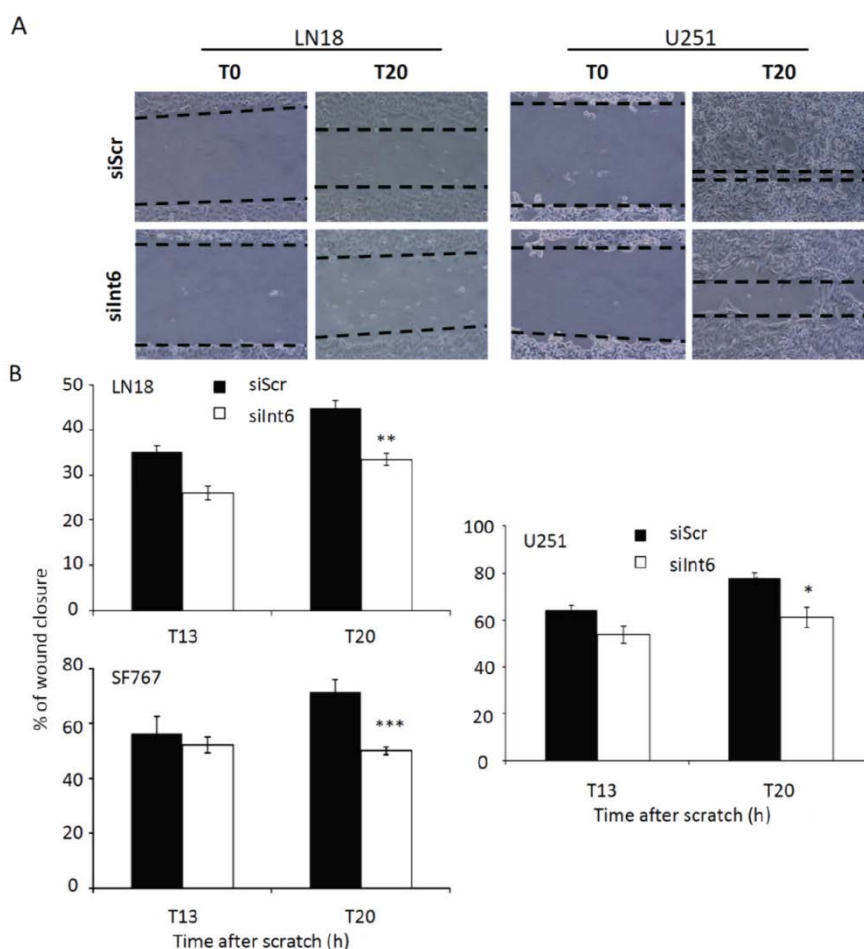

**Figure S7.** *Int6* gene silencing does not alter MAPK pathway in GBM cells. Western Blot analysis of MAPK pathway (MEK1, ERK and phospho-ERK) in glioma cells after *Int6* depletion,  $n = 3$ .

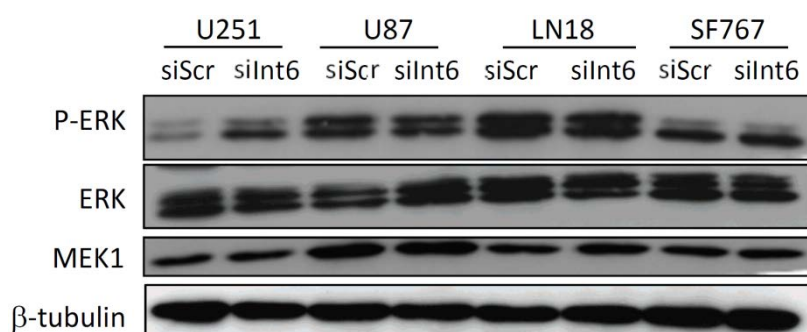

Supplement: Supplementary file 1 [file ijms-15-02172-s001.pdf]
